# Supplementary material for: Effect of the 3D Artificial Nichoid on the Morphology and Mechanobiological Response of Mesenchymal Stem Cells Cultured In Vitro
Source: MDPI journal article supplement (doi:10.3390/cells9081873), 2020-08-11
Supplement: s1 [file s1]

## MSCs multipotency characterization

**Figure S1.** *MSCs multipotency characterization.* (A) Alizarin Red staining on MSCs exposed to osteogenic differentiation medium demonstrates the ability of isolated cell to differentiate into osteoblasts. (B) Oil Red O staining on MSCs exposed to adipogenic differentiation medium confirms that isolated cells are able to differentiate into adipocytes.

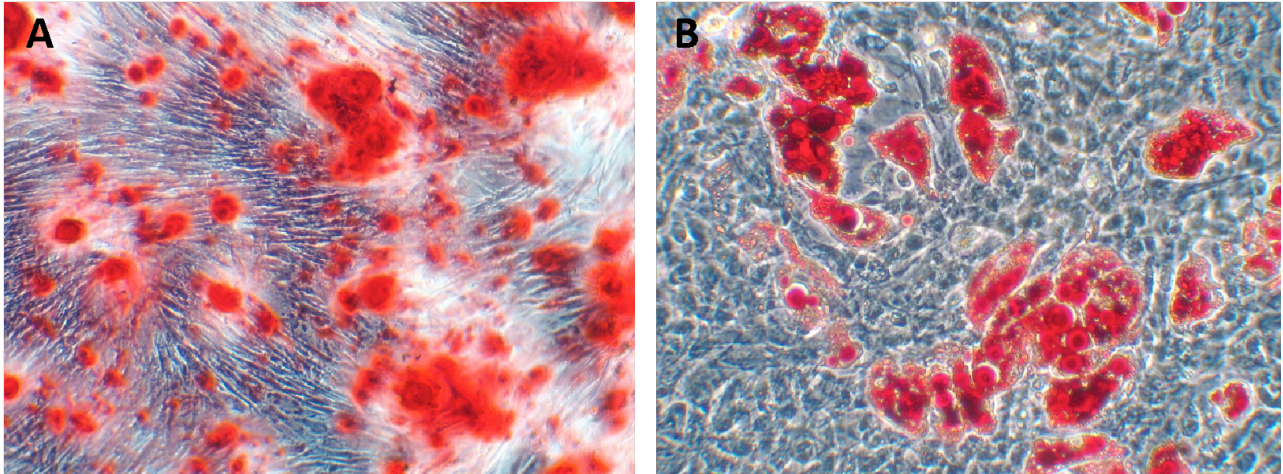

## Surface expression of rat mesenchymal stem cell markers

The staining for cell surface proteins was performed by incubating the cells with pre-optimized concentrations of antibodies at 4°C for 30 minutes in FACS buffer (PBS with 2%FBS and 1mM EDTA). Flow cytometry data were acquired on LSRFortessa X-20 (BD) and analyzed by FlowJo software version 10. All antibodies were supplied by BD. Anti-CD45 APC-Cy7 (clone OX-1), CD11b/c PE-Cy7 (clone OX-42), CD44 BV421 (clone OX-49), CD54 BB700 (clone 1A29), CD90 BV510 (clone HIS51) antibodies were all mouse anti-rat antibodies; RT1A[a,b,l] FITC (clone B5) was a rat anti-rat antibody and anti-CD29 Alexa Fluor 647 (clone Ha2/5) was a hamster anti-rat antibody. Appropriate isotype antibodies were used as controls.

**Results:** Rat MSC are negative for CD45 and CD11b expression. Rat MSC expressed high levels of CD44, CD29, CD90, CD54 and low levels of RT1-A (MHC I)

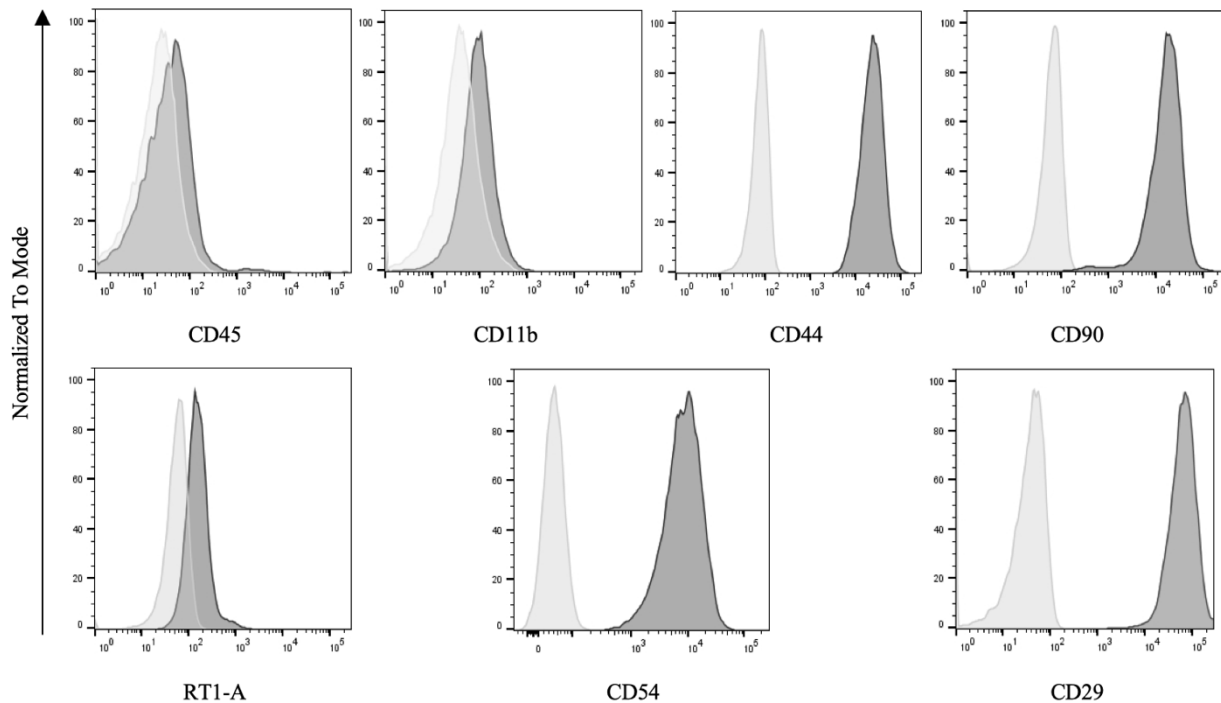

**Figure S2.** Representative flow cytometry histograms for rat MSC surface marker expression. Light gray histogram represents isotype expression (negative controls).

## Live/Dead

In order to investigate if cells died during the long-term culture, before detaching, in flat controls and in 3D Nichoids, we cultured MSCs in the same conditions and performed a Live/Dead Viability/Cytotoxicity test (Invitrogen detection technologies) to detect live and dead cells. The results of these experiments showed that almost no cells were stained by EthD-1 in 2D control MSC from 1 to 14 days, only occasionally we observed some cells per microscopic field stained with EthD-1 in the Nichoid substrate. Representative images are reported in Figure S3. While this does not exclude that some cells could detach from the substrate before dying, it is a sign that in both conditions all cells are viable.

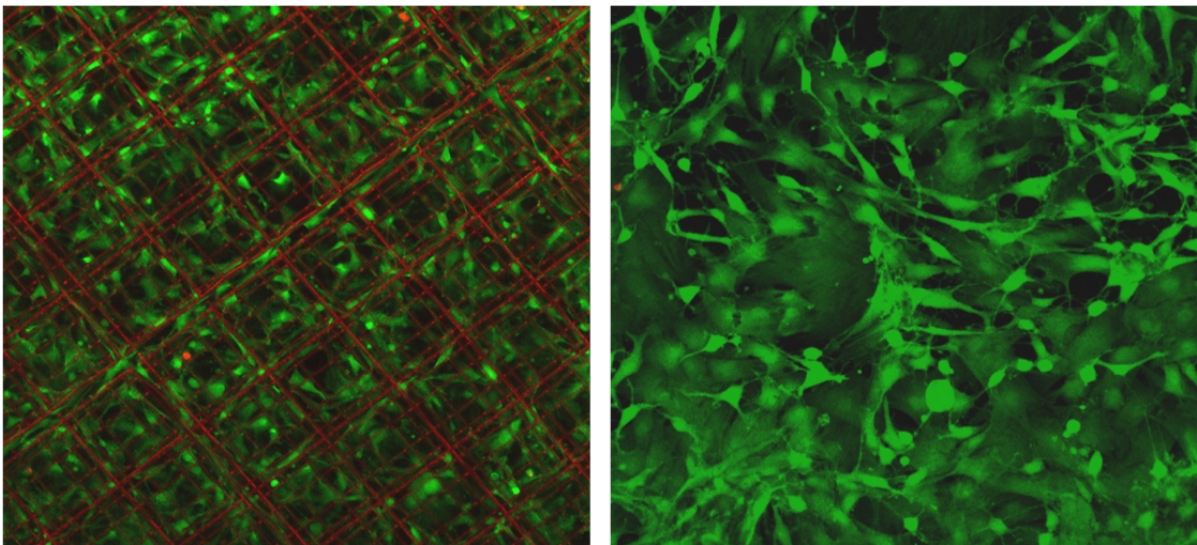

**Figure S3.** Live/Dead assay showing cells at 14 days of culture in 3D Nichoids (left) and flat controls (right).

## Rat Mesenchymal Stem Cell RT2 profiler PCR array (PARN-082ZC-6 SABioscience) - Gene table

|    |        |                                                                                                                |                                       |
|----|--------|----------------------------------------------------------------------------------------------------------------|---------------------------------------|
| 1  | Abcb1a | ATP-binding cassette, sub-family B (MDR/TAP), member 1A                                                        | Abcb1, Mdr1a                          |
| 2  | Acta2  | Smooth muscle alpha-actin                                                                                      | -                                     |
| 3  | Adipoq | Adiponectin, C1Q and collagen domain containing                                                                | Acadc, Acrp30                         |
| 4  | Alcam  | Activated leukocyte cell adhesion molecule                                                                     | -                                     |
| 5  | Anpep  | Alanyl (membrane) aminopeptidase                                                                               | AP-M, AP-N, Apm, Apn, KZP, Lap1, rAPN |
| 6  | Anxa5  | Annexin A5                                                                                                     | Anx5, LC5                             |
| 7  | Bdnf   | Brain-derived neurotrophic factor                                                                              | -                                     |
| 8  | Bglap  | Bone gamma-carboxyglutamate (gla) protein                                                                      | Bglap2, Bgp, Bgpr, Bgpra              |
| 9  | Bmp2   | Bone morphogenetic protein 2                                                                                   | -                                     |
| 10 | Bmp4   | Bone morphogenetic protein 4                                                                                   | BOMPR4A                               |
| 11 | Bmp6   | Bone morphogenetic protein 6                                                                                   | VGR                                   |
| 12 | Bmp7   | Bone morphogenetic protein 7                                                                                   | BMP-7                                 |
| 13 | Casp3  | Caspase 3                                                                                                      | Lice, Yama                            |
| 14 | Cd44   | Cd44 molecule                                                                                                  | CD44A, META, RHAMM                    |
| 15 | Col1a1 | Collagen, type I, alpha 1                                                                                      | COLIA1                                |
| 16 | Csf2   | Colony stimulating factor 2 (granulocyte-macrophage)                                                           | Gm-csf, Gmcsf                         |
| 17 | Csf3   | Colony stimulating factor 3 (granulocyte)                                                                      | Gcsf                                  |
| 18 | Ctnnb1 | Catenin (cadherin associated protein), beta 1                                                                  | Catnb                                 |
| 19 | Egf    | Epidermal growth factor                                                                                        | -                                     |
| 20 | Eng    | Endoglin                                                                                                       | -                                     |
| 21 | ErbB2  | V-erb-b2 erythroblastic leukemia viral oncogene homolog 2, neuro/glioblastoma derived oncogene homolog (avian) | -                                     |
| 22 | Fgf10  | Fibroblast growth factor 10                                                                                    | FGF-10                                |
| 23 | Fgf2   | Fibroblast growth factor 2                                                                                     | Fgf-2, bFGF                           |
| 24 | Fut1   | Fucosyltransferase 1                                                                                           | Futa                                  |
| 25 | Fut4   | Fucosyltransferase 4 (alpha (1,3) fucosyltransferase, myeloid-specific)                                        | Fuct                                  |
| 26 | Fzd9   | Frizzled homolog 9 (Drosophila)                                                                                | -                                     |
| 27 | Gdf15  | Growth differentiation factor 15                                                                               | -                                     |
| 28 | Gdf5   | Growth differentiation factor 5                                                                                | Cdmp1                                 |
| 29 | Gdf6   | Growth differentiation factor 6                                                                                | BMP-13, gdf16                         |
| 30 | Gdf7   | Growth differentiation factor 7                                                                                | -                                     |
| 31 | Hat1   | Histone acetyltransferase 1                                                                                    | -                                     |
| 32 | Hdac1  | Histone deacetylase 1                                                                                          | -                                     |
| 33 | Hgf    | Hepatocyte growth factor                                                                                       | HPTA                                  |
| 34 | Hnf1a  | HNF1 homeobox A                                                                                                | HNF1, LF-B1, Lfb1, Tcf1               |
| 35 | Icam1  | Intercellular adhesion molecule 1                                                                              | CD54, ICAM                            |
| 36 | Ifng   | Interferon gamma                                                                                               | IFNG2                                 |
| 37 | Igf1   | Insulin-like growth factor 1                                                                                   | -                                     |
| 38 | Il10   | Interleukin 10                                                                                                 | IL10X                                 |
| 39 | Il1b   | Interleukin 1 beta                                                                                             | -                                     |
| 40 | Il6    | Interleukin 6                                                                                                  | ILg6, Ifnb2                           |
| 41 | Ins2   | Insulin 2                                                                                                      | -                                     |
| 42 | Itga6  | Integrin, alpha 6                                                                                              | -                                     |
| 43 | Itgav  | Integrin, alpha V                                                                                              | Cd51                                  |
| 44 | Itgax  | Integrin, alpha X                                                                                              | RGD1561123                            |
| 45 | Itgb1  | Integrin, beta 1                                                                                               | -                                     |

|    |              |                                                              |                                       |
|----|--------------|--------------------------------------------------------------|---------------------------------------|
| 46 | Jag1         | Jagged 1                                                     | -                                     |
| 47 | Kdr          | Kinase insert domain receptor                                | Vegfr-2                               |
| 48 | Kitlg        | KIT ligand                                                   | Kitl, Mgf, SCF                        |
| 49 | Lif          | Leukemia inhibitory factor                                   | -                                     |
| 50 | <b>Mcam</b>  | <b>Melanoma cell adhesion molecule</b>                       | CD146, Muc18                          |
| 51 | Mitf         | Microphthalmia-associated transcription factor               | -                                     |
| 52 | Mmp2         | Matrix metalloproteinase 2                                   | -                                     |
| 53 | Nes          | Nestin                                                       | -                                     |
| 54 | Ngfr         | Nerve growth factor receptor (TNFR superfamily, member 16)   | LNGFR, RNNGFRR, Tnfrsf16, p75, p75NTR |
| 55 | Notch1       | Notch homolog 1, translocation-associated (Drosophila)       | NOTCH, TAN1                           |
| 56 | Nt5e         | 5' nucleotidase, ecto                                        | CD73, Nt5                             |
| 57 | Nudt6        | Nudix (nucleoside diphosphate linked moiety X)-type motif 6  | Gfg                                   |
| 58 | Pdgfrb       | Platelet derived growth factor receptor, beta polypeptide    | PDGFR-1                               |
| 59 | Pigs         | Phosphatidylinositol glycan anchor biosynthesis, class S     | -                                     |
| 60 | Pou5f1       | POU class 5 homeobox 1                                       | -                                     |
| 61 | Pparg        | Peroxisome proliferator-activated receptor gamma             | -                                     |
| 62 | Prom1        | Prominin 1                                                   | CD133, Prom                           |
| 63 | <b>Ptk2</b>  | <b>PTK2 protein tyrosine kinase 2</b>                        | FAK, FRNK, p125FAK                    |
| 64 | <b>Ptprc</b> | <b>Protein tyrosine phosphatase, receptor type, C</b>        | CD45, L-CA, Lca, RT7, T200            |
| 65 | Smurf1       | Similar to RIKEN cDNA 4930431E10                             | RGD1309707                            |
| 66 | Rhoa         | Ras homolog gene family, member A                            | Arha, Arha2                           |
| 67 | Runx2        | Runt-related transcription factor 2                          | Cbfa1, OSF-2                          |
| 68 | Slc17a5      | Solute carrier family 17 (anion/sugar transporter), member 5 | -                                     |
| 69 | Smad4        | SMAD family member 4                                         | Madh4                                 |
| 70 | Smurf2       | SMAD specific E3 ubiquitin protein ligase 2                  | RGD1310067                            |
| 71 | Sox2         | SRY (sex determining region Y)-box 2                         | RGD1565646                            |
| 72 | Sox9         | SRY-box containing gene 9                                    | SRY                                   |
| 73 | Tbx5         | T-box 5                                                      | -                                     |
| 74 | Tert         | Telomerase reverse transcriptase                             | -                                     |
| 75 | Tgfb1        | Transforming growth factor, beta 1                           | Tgfb                                  |
| 76 | Tgfb3        | Transforming growth factor, beta 3                           | TGF-B3                                |
| 77 | Thy1         | Thy-1 cell surface antigen                                   | CD7                                   |
| 78 | Tnf          | Tumor necrosis factor (TNF superfamily, member 2)            | RATTNF, TNF-alpha, Tnfa               |
| 79 | <b>Vcam1</b> | <b>Vascular cell adhesion molecule 1</b>                     | VCAM1B                                |
| 80 | Vegfa        | Vascular endothelial growth factor A                         | VEGF-A, VEGF164, VPF, Vegf            |
| 81 | <b>Vim</b>   | <b>Vimentin</b>                                              | -                                     |
| 82 | Vwf          | Von Willebrand factor                                        | -                                     |
| 83 | Wnt3a        | Wingless-type MMTV integration site family, member 3A        | -                                     |
| 84 | Zfp42        | Zinc finger protein 42                                       | Zfp971                                |
| 85 | <b>Actb</b>  | <b>Actin, beta</b>                                           | Actx                                  |
| 86 | B2m          | Beta-2 microglobulin                                         | -                                     |
| 87 | Hprt1        | Hypoxanthine phosphoribosyltransferase 1                     | Hgpptase, Hprt                        |
| 88 | Ldha         | Lactate dehydrogenase A                                      | Ldh1                                  |
| 89 | Rplp1        | Ribosomal protein, large, P1                                 | -                                     |
